# Supplementary material
Source: PubMed Central journal article supplement (PMC1383519)
Supplement: 7600936s1.pdf [file 7600936s1.pdf]

**Table I.** Rate of steady-state ATPase activity and burst amplitude of first hydrolytic turnover of ATP in the rapid quench ATPase assay at 0°C for the wild type and amino acid 38 mutants in the absence of DNA and in the presence of G.T mismatch containing DNA.

|             | <b>No DNA</b>             |                                 | <b>G.T mismatch</b> |                                 |
|-------------|---------------------------|---------------------------------|---------------------|---------------------------------|
|             | Rate (min <sup>-1</sup> ) | Amplitude<br>(ATP/monomer MutS) | Rate                | Amplitude<br>(ATP/monomer MutS) |
| <b>WT</b>   | 0.78 ± 0.17               | 0.57 ± 0.07                     | 0.75 ± 0.31         | 0.14 ± 0.04                     |
| <b>E38A</b> | 0.52 ± 0.10               | 0.58 ± 0.16                     | 1.17 ± 0.45         | 0.62 ± 0.01                     |
| <b>E38T</b> | 0.50 ± 0.03               | 0.59 ± 0.10                     | 1.09 ± 0.25         | 0.07 ± 0.06                     |
| <b>E38Q</b> | 0.69 ± 0.14               | 0.65 ± 0.06                     | 1.47 ± 0.29         | 0.10 ± 0.05                     |
