# Supplementary material
Source: PubMed Central journal article supplement (PMC1383519)
Supplement: 7600936s2.pdf [file 7600936s2.pdf]

**Table II.** Kmax values (1/s) upon release in the presence of ATP for the wild type and the E38A mutants. This experiment was done using single and double end-blocked G.T mismatch-containing DNA, by surface plasmon resonance.

|                           | WT            | E38A          | E38T          | E38Q          |
|---------------------------|---------------|---------------|---------------|---------------|
| <b>Single block</b>       | 0.142 ± 0.007 | 0.146 ± 0.005 | 0.141 ± 0.003 | 0.136 ± 0.003 |
| <b>Double end-blocked</b> | 0.036 ± 0.002 | 0.098 ± 0.006 | 0.050 ± 0.002 | 0.038 ± 0.003 |
